# Supplementary material for: Functional trait diversity of Cyclanthaceae and its convergent evolution with Araceae in Neotropical forests
Source: PeerJ. 2023 Jul 18;11:e15557. doi: 10.7717/peerj.15557 (PMC10361079; doi:10.7717/peerj.15557)
Supplement: Supplemental Information 1 [file peerj-11-15557-s001.xls]

## Sheet: Sheet1
Supplemental Table 1. Raw data for leaf area, fresh weight, dry weight, specfic leaf area, and water content. See Methods section for sampling details and Table 1 for full species names.
Species	:eaf no.	area	fresh weight	dry weight	SLA	fw/dw	water c0ntent
		(cm2)	(mg)	(mg)			(fw-dw)/dw
G. micans	1	17.511	0.233	0.044	397.977	5.29545	4.29545
G. micans	2	17.147	0.224	0.041	418.22	5.46341	4.46341
G. micans	3	14.784	0.198	0.035	422.4	5.65714	4.65714
mean		16.4807	0.218333	0.04	412.866	5.472	4.472
SD		1.20889	0.0148399	0.00374166	10.6651	0.147783	0.147783
G.cwarscewiczii	1	172.974	4.542	0.518	333.927	8.76834	7.76834
G. warscewiczii	2	407.461	12.026	1.485	274.385	8.09832	7.09832
G.warscewiczii	3	259.65	7.409	0.796	326.193	9.30779	8.30779
mean					311.502	8.72482	7.72482
SD
G, cleistantha	1	683.476	13.71	2.11	323.922	6.49763	5.49763
G. cleistantha	2	583.652	13.237	2.335	249.958	5.66895	4.66895
G. cleistantha	3	535.913	10.429	1.714	312.668	6.0846	5.0846
mean					295.516	6.08373	5.08373
SD
G. inocephala	1	2157.17	44.443	10.546	204.548	4.2142	3.2142
G. inocephala	2	3008.49	67.14	15.184	198.136	4.42176	3.42176
G. inocephala	3	2223.8	49.305	11.3	196.796	4.36327	3.36327
mean					199.827	4.33308	3.33308
SD
G. marantifolia	1	1382.78	29.09	4.591	301.193	6.33631	5.33631
G. marantifolia	2	890.02	15.335	3.031	293.639	5.05939	4.05939
G. marantifolia	3	1021.23	15.965	3.017	338.492	5.29168	4.29168
mean					311.108	5.56246	4.56246
SD
G. gymnocarpa	1	1694.78	44.51	7.25	233.762	6.13931	5.13931
G. gymnocarpa	2	1629.41	42.118	8.351	195.115	5.04347	4.04347
G. gymnocarpa	3	1013.37	27.815	4.207	240.876	6.6116	5.6116
mean					223.251	5.93146	4.93146
SD
C.lasiostachya	1	380.917	5.696	1.518	250.933	3.75231	2.75231
C.lasiostachya	2	964.225	16.24	4.447	216.826	3.6519	2.6519
C.lasiostachya	3	456.227	6.462	1.785	255.589	3.62017	2.62017
mean					241.116	3.67479	2.67479
SD
G. leucostachys	1	493.89	17.138	1.957	252.371	8.75728	7.75728
G. leucostachys	2	772.4	31.466	2.274	339.666	13.8373	12.8373
G. leucostachys	3	744.072	34.648	3.984	186.765	8.69679	7.69679
mean					259.601	10.4305	9.43045
SD
C.similis	1	696.922	9.059	2.1	331.868	4.31381	3.31381
C.similis	2	1661.69	26.799	6.218	267.239	4.30991	3.30991
C.similis	3	1543.45	25.998	6.011	256.771	4.32507	3.32507
mean					285.292	4.31626	3.31626
SD
C.lutea	1	2988.62	60.82	17.672	169.116	3.4416	2.4416
C.lutea	2	2359.85	46.009	12.991	181.653	3.54161	2.54161
C.lutea	3	1957.96	33.181	10.942	178.94	3.03244	2.03244
mean					176.57	3.33855	2.33855
SD
C.crotalifera	1	2419.67	45.508	15.844	152.719	2.87225	1.87225
C.crotalifera	2	1663.8	33.075	9.705	171.438	3.40804	2.40804
C.crotalifera	3	2003.46	37.936	11.091	180.639	3.42043	2.42043
mean					168.265	3.23357	2.23357
SD
S.fulvovirens	1	384.848	10.766	2.241	171.73	4.80411	3.80411
S.fulvovirens	2	323.582	7.98	1.56	207.424	5.11538	4.11538
S.fulvovirens	3	321.298	8.454	1.669	192.509	5.06531	4.06531
mean					190.555	4.99493	3.99493
SD
S.wendlandii	1	671.281	22.888	3.489	192.399	6.56005	5.56005
S.wendlandii	2	673.824	22.742	3.11	216.664	7.31254	6.31254
S.wendlandii	3	892.484	31.863	5.049	176.765	6.31075	5.31075
mean					195.276	6.72778	5.72778
SD
S.laeve	1	244.288	5.161	1.198	203.913	4.30801	3.30801
S.laeve	2	244.307	5.853	1.445	169.071	4.05052	3.05052
S.laeve	3	276.323	5.997	1.373	201.255	4.36781	3.36781
mean					191.413	4.24211	3.24211
SD
S.friedrichsthallii	1	529.716	14.221	2.154	245.922	6.60214	5.60214
S.friedrichsthallii	2	299.745	8.6	1.529	196.04	5.62459	4.62459
S.friedrichsthallii	3	282.823	9.096	1.776	159.247	5.12162	4.12162
mean					200.403	5.78278	4.78278
SD
S.phryniifolium	1	344.852	6.881	1.292	266.913	5.32585	4.32585
S.phryniifolium	2	389.197	8.202	1.311	296.87	6.25629	5.25629
S.phryniifolium	3	189.356	4.375	0.709	267.075	6.17066	5.17066
mean					276.953	5.9176	4.9176
SD
H.irrasa	1	712.347	14.054	2.953	241.228	4.75923	3.75923
H.irrasa	2	770.011	14.119	2.888	266.624	4.88885	3.88885
H.irrasa	3	602.358	11.143	2.209	272.684	5.04436	4.04436
mean					260.179	4.89748	3.89748
SD
H.mathiasiae	1	847.601	18.763	4.538	186.779	4.13464	3.13464
H.mathiasiae	2	694.96	14.587	3.326	208.948	4.38575	3.38575
H.mathiasiae	3	500.852	11.965	2.915	171.819	4.10463	3.10463
mean					189.182	4.20834	3.20834
SD
H.umbrophila	1	892.211	18.402	3.739	238.623	4.92164	3.92164
H.umbrophila	2	1034.23	24.384	4.131	250.359	5.90269	4.90269
H.umbrophila	3	952.33	21.193	3.955	240.791	5.35853	4.35853
mean					243.258	5.39429	4.39429
SD
H.imbricata	1	5034.1	119.92	27.713	181.651	4.32721	3.32721
H.imbricata	2	3588.6	85.49	23.25	154.348	3.67699	2.67699
H.imbricata	3	3185.77	65.05	15.511	205.388	4.1938	3.1938
mean					180.462	4.066	3.066
SD
H.latispatha	1	2889.46	65.48	15.756	183.388	4.15588	3.15588
H.latispatha	2	1949	36.582	7.599	256.481	4.81405	3.81405
H.latispatha	3	3555.37	76.07	20.034	177.467	3.79705	2.79705
mean					205.779	4.25566	3.25566
SD
H.pogonantha	1	4431.48	96.2	25.253	175.483	3.80945	2.80945
H.pogonantha	2	4579.24	104.85	35.335	129.595	2.96731	1.96731
H.pogonantha	3	5414.87	141.25	43.402	124.761	3.25446	2.25446
mean					143.28	3.34374	2.34374
SD
H.sarapiquensis	1	1660.17	28.55	6.723	246.939	4.24662	3.24662
H.sarapiquensis	2	1803.93	31.434	6.916	260.834	4.54511	3.54511
H.sarapiquensis	3	1673.62	28.139	6.516	256.848	4.31845	3.31845
mean					254.874	4.37006	3.37006
SD
H.wagneriana	1	2273.98	44.321	23.672	96.0621	1.8723	0.872296
H.wagneriana	2	2369.04	44.781	27.632	85.7354	1.62062	0.620621
H.wagneriana	3	2447.81	51.434	25.249	96.9468	2.03707	1.03707
mean					93	1.84333	0.843329
SD
D.tonduzii	1	693.496	26.784	3.171	218.699	8.44655	7.44655
D.tonduzii	2	720.522	33.227	3.875	185.941	8.57471	7.57471
D.tonduzii	3	756.725	28.464	3.687	205.241	7.7201	6.7201
mean					203	8.25	7.24
SD
D.longispatha	1	276.27	9.68	1.8	153.483	5.37778	4.37778
D.longispatha	2	180.58	5.577	1.117	161.665	4.99284	3.99284
D.longispatha	3	333.481	9.676	2.149	155.18	4.50256	3.50256
mean					157	4.96	4.96
SD
A.uncinata	1	1153.53	32.55	6.871	167.884	4.7373	3.7373
A.uncinata	2	1062.3	29.603	6.215	170.924	4.76315	3.76315
A.uncinata	3	1363.67	39.455	8.526	159.943	4.62761	3.62761
mean					166.25	4.70936	3.70936
SD
A.sleeperae	1	2146.97	58.763	13.035	164.708	4.50809	3.50809
A.sleeperae	2	1355.09	33.041	7.671	176.65	4.30726	3.30726
A.sleeperae	3	1726.37	43.371	10.491	164.557	4.13411	3.13411
mean					169	4.32	3.31
SD
C.laevis	1	439.269	24.733	4.314	101.824	5.73319	4.73319
C.laevis	2	448.187	24.121	4.931	90.8917	4.89171	3.89171
C.laevis	3	386.143	21.858	4.502	85.7714	4.85518	3.85518
mean					93	5.16	4.16
SD
C.scaber	1	146.213	4.346	0.837	174.687	5.19235	4.19235
C.scaber	2	191.089	6.312	1.085	176.119	5.81751	4.81751
C.scaber	3	191.47	6.147	0.944	202.828	6.51165	5.51165
mean					184.545	5.84051	4.84051
SD
C.malortieanus	1	295.592	14.003	1.157	255.481	12.1029	11.1029
C.malortieanus	2	347.745	19.537	1.622	214.393	12.045	11.045
C.malortieanus	3	486.943	27.684	1.93	252.302	14.344	13.344
mean					240	12.83	11.83
SD
R.cernua	1	263.208	5.827	1.36	193.535	4.28456	3.28456
R.cernua	2	249.204	7.143	1.743	142.974	4.09811	3.09811
R.cernua	3	160.612	3.783	1.012	158.708	3.73814	2.73814
mean					165	4.04	3.04
SD
R.pluriplicata	1	565.813	13.901	3.062	184.785	4.53984	3.53984
R.pluriplicata	2	298.952	5.942	1.207	247.682	4.92295	3.92295
R.pluriplicata	3	421.902	9.947	2.079	202.935	4.78451	3.78451
mean					211.801	4.7491	3.7491
SD
C.bipartitus	1	1939.11	50.493	10.107	191.858	4.99584	3.99584
C.bipartitus	2	1738.93	43.742	9.775	177.895	4.47488	3.47488
C.bipartitus	3	1746.01	43.382	8.818	198.005	4.91971	3.91971
mean					189.253	4.79681	3.79681
SD
P.leucostachya	1	1773.19	32.017	8.662	204.709	3.69626	2.69626
P.leucostachya	2	1806.67	31.916	8.262	218.672	3.86299	2.86299
P.leucostachya	3	1663.19	29.741	8.058	206.402	3.69087	2.69087
mean					210	3.85	2.75
SD
P.grandipes	1	606.934	14.538	2.216	273.887	6.56047	5.56047
P.grandipes	2	504.264	12.13	1.86	271.11	6.52151	5.52151
P.grandipes	3	450.65	10.719	1.638	275.122	6.54396	5.54396
mean					273.373	6.54198	5.54198
SD
I.inflatus	1	770.368	12.208	3.135	245.731	3.8941	2.8941
I.inflatus	2	711.588	11.011	3.137	226.837	3.51004	2.51004
I.inflatus	3	1066.6	16.139	4.273	249.613	3.77697	2.77697
mean					240.727	3.72704	2.72704
SD
C.sulcata	1	2149.14	45.552	11.806	182.038	3.85838	2.85838
C.sulcata	2	2328.8	50.982	13.693	170.072	3.72322	2.72322
C.sulcata	3	2141.89	45.239	10.423	205.496	4.34031	3.34031
mean					185.869	3.97397	2.97397
SD
D.wedelii	1	189.521	5.052	1.053	179.982	4.79772	3.79772
D.wedelii	2	243.282	6.476	1.194	203.754	5.42379	4.42379
D.wedelii	3	207.346	5.644	1.2	172.788	4.70333	3.70333
mean					185.508	4.97495	3.97495
SD
A.ochranthum	1	1176.64	27.788	4.665	252.227	5.9567	4.9567
A.ochranthum	2	1014.54	22.539	4.806	211.098	4.68976	3.68976
A.ochranthum	3	1659.91	38.672	7.014	236.656	5.51354	4.51354
mean					233.327	5.38667	4.38667
SD
