# Supplementary material for: Functional trait diversity of Cyclanthaceae and its convergent evolution with Araceae in Neotropical forests
Source: PeerJ. 2023 Jul 18;11:e15557. doi: 10.7717/peerj.15557 (PMC10361079; doi:10.7717/peerj.15557)
Supplement: Supplemental Information 2 [file peerj-11-15557-s002.xls]

## Sheet: Samples
Supplemental Table 2 - Raw data . Leaf N, d13C, d15N, and C to N ratio
Species	d13C	d15N	N (%)	C/N ratio		C Amount (ug)	N Amount (ug)
A Ochra- hoja 1	-36.3846	1.53913	3.87752	13.5419		1102.69	81.4279
A ochra- hoja 2	-32.4485	3.60189	3.48382	13.9925		1023.69	73.1603
A ohcran- hoja 3	-34.5078	2.72057	4.44464	13.7657		1284.85	93.3374
	-34.447	2.62053	3.93533	13.7667
As sleep- hoja 2	-37.9647	2.89055	2.8511	21.0621		1261.06	59.8731
A sleep- hoja 1	-38.4422	4.1041	2.70741	18.8385		1071.08	56.8557
A sleep- hoja 3	-38.3174	2.84925	3.57911	15.7237		1181.81	75.1612
	-38.2414	3.2813	3.04587	18.5415
A uncin- hoja 1	-38.7473	2.8663	1.96495	22.7058		936.933	41.264
A unicina	-37.4868	2.22932	2.05704	26.6251		1150.15	43.1979
A unicina- hoja 2	-38.5773	3.44163	2.9121	22.3084		1364.25	61.1541
	-38.2705	2.84575	2.31137	23.8798
G cleist- hoja 2	-34.6465	2.54397	3.46465	14.7212		1071.08	72.7576
G cleist- hoja 1	-36.9395	4.69019	3.76677	13.5404		1071.08	79.1023
G cleistant-hoja 3	-36.2038	2.60877	3.54111	15.4666		1150.15	74.3633
	-35.9299	3.28098	3.59084	14.5761
C crotali- hoja 3	-30.4941	1.94056	3.54111	18.6664		1388.1	74.3633
C crotali-hoja 1	-30.9341	2.28525	3.3488	16.4674		1158.06	70.3248
C crotali- hoja 2	-30.509	2.24885	2.16795	19.5416		889.671	45.5271
	-30.6457	2.15822	3.01929	18.2251
G gymnoc- hoja 3	-33.2708	2.75775	3.63581	15.8934		1213.5	76.3521
G gymnoc-hoja 2	-34.7935	0.979216	3.61695	15.0382		1142.24	75.9559
G gymno-hoja 1	-34.4337	2.37279	2.76923	16.3824		952.696	58.1538
	-34.166	2.03658	3.34066	15.7713
G inocep- hoja 2	-34.2404	3.91391	2.76923	18.9617		1102.69	58.1538
C inocep- hoja 3	-33.4393	4.51691	2.51989	17.11		905.42	52.9177
C lonoce- hoja 1	-34.8591	4.10683	2.81024	18.417		1086.88	59.0151
	-34.1796	4.17922	2.69979	18.1629
C lasiast- hoja 2	-36.1376	3.63861	3.48382	15.8291		1158.06	73.1603
C lasiost- hoja 1	-37.0345	2.2875	3.09301	14.5461		944.814	64.9533
C lasiost- hoja 3	-37.7703	2.42056	3.4069	14.0878		1007.91	71.5449
	-36.9808	2.78222	3.32791	14.821
C leucost-hoja 2	-33.4183	1.82295	2.66601	15.4691		866.056	55.9863
G leucost- hoja 3	-34.421	2.55521	2.18094	18.2226		834.588	45.7997
	-33.9196	2.18908	2.42347	16.8458
C lutea- hoja 2	-29.0948	2.59948	3.3682	19.2876		1364.25	70.7323
C lutea- hoja 1	-29.3609	2.65298	2.47779	19.8254		1031.59	52.0336
C lutea-hoja 3	-30.0664	1.70066	2.9121	16.4814		1007.91	61.1541
	-29.5074	2.31771	2.91937	18.5315
C malor- hoja 1	-35.2548	2.91979	2.04612	22.3555		960.58	42.9685
C malort-hoja 3	-34.532	2.19215	2.99289	16.6645		1047.38	62.8508
Co malort- hoja 2	-34.6639	2.91914	2.13544	18.2601		818.86	44.8442
	-34.8169	2.67703	2.39148	19.0934
G marant- hoja 1	-32.2154	5.18126	3.69217	13.6102		1055.28	77.5356
G marantif- hoja 2	-33.4567	4.23579	3.07307	13.1762		850.32	64.5344
G maranti-hoja 3	-33.5827	5.65744	3.01299	12.9417		818.86	63.2729
	-33.085	5.02483	3.25941	13.2427
G micans- hoja 2	-37.0763	3.40455	2.76923	17.3318		1007.91	58.1538
G micans- hoja 3	-37.2716	2.9708	3.03306	14.4624		921.174	63.6942
micans- hoja 1	-37.6184	2.34793	3.42619	14.3376		1031.59	71.9499
	-37.3221	2.90776	3.07616	15.3773
C scaber- hoja 1	-34.5624	1.49871	2.30357	25.0852		1213.5	48.375
C scaber- hoja 2	-34.6901	0.928355	2.17877	24.1003		1102.69	45.7543
Co scaber-hoja 3	-35.2185	1.73339	2.87147	22.2288		1340.42	60.3009
	-34.8237	1.38682	2.45127	23.8048
C similis- hoja 1	-36.7348	1.75841	2.81024	14.1419		834.588	59.0151
C similis- hoja 2	-36.2175	2.61823	3.46465	16.6786		1213.5	72.7576
C similis- hoja 3	-36.2623	2.33128	3.30987	16.3195		1134.33	69.5073
	-36.4049	2.23597	3.19492	15.7134
C sulc- hoja 1	-38.0728	5.34802	3.56013	18.3541		1372.2	74.7627
C sulcata- hoja 2	-36.6858	2.86821	3.52205	18.2302		1348.36	73.9631
C sulcata- hoja 3	-38.1988	5.01197	3.11292	17.5941		1150.15	65.3713
	-37.6525	4.4094	3.39837	18.0595
G warsce- hoja 3	-36.6827	-1.84844	2.97275	13.6208		850.32	62.4278
G warscew- hoja 1	-36.888	0.160126	3.71088	12.5288		976.351	77.9285
G warscew- hoja 2	-37.3606	-2.27607	2.93236	13.6807		842.453	61.5795
	-36.9771	-1.32146	3.20533	13.2768
Cy bipart-hoja 3	-37.6924	-0.0658759	3.52205	18.0154		1332.48	73.9631
Cy biparti-hoja 1	-35.3693	1.81692	2.95258	20.3383		1261.06	62.0041
Cy biparti- hoja 2	-35.537	3.18803	2.87147	17.8932		1078.98	60.3009
	-36.1996	1.64636	3.11537	18.749
D longisp -hoja 2	-33.8664	1.16658	3.76677	11.9442		944.814	79.1023
D longisp- hoja 1	-34.2404	2.79151	3.65464	15.3987		1181.81	76.7474
D longisp- hoja 3	-35.0386	2.27727	3.52205	15.4433		1142.24	73.9631
	-34.3818	2.07845	3.64782	14.2621
D tonduzii- hoja 1	-33.0043	1.01617	3.76677	13.2408		1047.38	79.1023
D tonduzii- hoja 2	-31.3546	-0.698542	3.59805	12.0872		913.296	75.559
D tonduzii- hoja 3	-33.6202	0.0511033	4.28914	12.4179		1118.51	90.0719
	-32.6597	0.122909	3.88465	12.582
D wedelii- hoja 1	-31.9545	-0.91717	2.97275	18.4237		1150.15	62.4278
D wedelii- hoja 2	-34.01	1.97474	3.61695	17.5428		1332.48	75.9559
D wedelii- hoja 3	-30.5798	0.35834	2.51989	21.4357		1134.33	52.9177
	-32.1814	0.471969	3.03653	19.134
H imbri- hoja 1	-33.1683	2.29505	2.45668	18.7722		968.465	51.5904
H imbri- hoja 2	-30.9927	0.914215	3.87752	15		1221.42	81.4279
H imbri- hoja 3	-32.6146	1.21927	2.66601	18.4257		1031.59	55.9863
	-32.2585	1.47618	3.00007	17.3993
H irrasa- hoja 1	-34.8433	1.98265	2.43554	19.5521		1000.02	51.1463
H irrasa- hoja 2	-33.0948	1.38262	2.97275	20.8356		1300.72	62.4278
H irrasa-hoja 3	-36.0248	1.72343	2.45668	20.6081		1063.18	51.5904
	-34.6543	1.69624	2.62166	20.3319
H latisp- hoja 1	-32.9235	3.78874	4.81156	11.7745		1189.73	101.043
H latispa- hoja 2	-31.9654	3.74181	2.93236	13.4253		826.723	61.5795
H latispa- hoja 3	-29.0019	3.92927	4.71335	10.9808		1086.88	98.9803
	-31.2969	3.81994	4.15242	12.0602
H math- hoja 1	-34.3591	3.54368	3.80384	15.1913		1213.5	79.8807
H math- hoja 3	-33.3988	2.98732	3.91412	16.9842		1396.05	82.1966
H mathi- hoja 2	-34.7742	3.46376	2.37187	18.3359		913.296	49.8093
	-34.1773	3.33159	3.36328	16.8372
H pogonan- hoja 1	-28.7154	5.44099	2.97275	19.4384		1213.5	62.4278
H pogonan-hoja 3	-28.8689	1.96792	3.13279	16.5208		1086.88	65.7886
H pogonan- hoja 2	-27.7012	1.73489	3.56013	17.5042		1308.66	74.7627
	-28.4285	3.04793	3.22189	17.8211
H sarapiq- hoja 2	-36.4895	5.40505	3.80384	16.5814		1324.54	79.8807
H sarapiq- hoja 3	-36.0564	4.36689	3.3682	18.3894		1300.72	70.7323
H savopiq-hoja 1	-33.8087	2.79274	2.93236	15.599		960.58	61.5795
	-35.4515	4.18822	3.36814	16.8566
H umb- hoja 2	-32.4422	4.60276	4.14829	12.5673		1094.79	87.1141
H umb- hoja 1	-34.1222	2.91539	3.91412	15.149		1245.2	82.1966
H umb- hoja 3	-35.6734	2.6175	3.56013	13.9038		1039.48	74.7627
	-34.0793	3.37855	3.87418	13.8734
H wagn- hoja 2	-28.0365	10.2851	3.17241	13.3543		889.671	66.6207
H wang- hoja 1	-29.0187	8.38294	2.49886	17.8545		936.933	52.476
H wang- hoja 3	-28.5605	12.0148	4.00496	15.0883		1268.99	84.1042
	-28.5386	10.2276	3.22541	15.4323
I Infaltus- hoja 2	-35.0883	1.56958	2.23918	19.7575		929.053	47.0229
I Inflatus- hoja 1	-35.7932	3.09917	3.25119	20.0981		1372.2	68.2751
I Inflatus- hoja 3	-36.5102	1.72106	2.21764	21.4732		1000.02	46.5705
	-35.7972	2.12993	2.56934	20.4429
P grand- hoja 1	-34.8729	3.94029	3.42619	12.584		905.42	71.9499
P grand- hoja 3	-36.6516	2.17964	4.37592	13.4641		1237.27	91.8942
Ph grandi-hoja 2	-36.5732	2.87139	3.52205	11.8157		873.927	73.9631
	-36.0326	2.99711	3.77472	12.6213
P leiost- hoja 1	-33.2791	5.03304	3.15262	16.0589		1063.18	66.205
P leiost- hoja 2	-32.2367	5.56769	3.61695	16.7069		1268.99	75.9559
P leiost- hoja 3	-32.9552	5.11977	2.99289	18.5516		1165.98	62.8508
	-32.8237	5.24017	3.25415	17.1058
R cernua- hoja 1	-37.0583	3.5216	2.83069	21.7478		1292.79	59.4445
R cernua- hoja 2	-32.911	3.34589	3.19217	19.8772		1332.48	67.0355
R cernua- hoja 3	-36.241	7.03846	2.62446	20.2946		1118.51	55.1136
	-35.4034	4.63532	2.88244	20.6399
R pluripl- hoja 1	-35.5631	0.816643	2.24349	26.5982		1253.13	47.1132
R pluripli- hoja 2	-37.4725	1.18556	1.84777	24.7553		960.58	38.8031
R pluripli- hoja 3	-36.6787	1.93621	2.27571	27.7158		1324.54	47.79
	-36.5714	1.31281	2.12232	26.3564
S friedri- hoja 1	-35.261	2.78041	4.41035	11.2234		1039.48	92.6175
S friedri- hoja 2	-35.9807	8.14831	4.27167	12.3806		1110.6	89.7051
S friedri- hoja 3	-36.2633	8.11765	4.63044	12.1537		1181.81	97.2392
	-35.835	6.34879	4.43749	11.9192
S fulv- hoja 1	-37.7886	2.86049	4.77898	12.3285		1237.27	100.359
S fulv- hoja 2	-36.9578	3.13726	4.90838	11.1583		1150.15	103.076
S fulv- hoja 3	-37.2267	2.8744	4.25416	10.9288		976.351	89.3373
	-37.3244	2.95738	4.64717	11.4719
S laevi- hoja 1	-37.5808	3.80615	5.17514	12.7726		1388.1	108.678
S laevi- hoja 3	-37.2194	3.10489	3.3682	13.2462		936.933	70.7323
S laevi-hoja 2	-36.5418	3.39714	4.44464	13.7657		1284.85	93.3374
	-37.114	3.43606	4.32933	13.2615
S phry- hoja 1	-37.4626	3.79037	3.57911	14.7762		1110.6	75.1612
S phry- hoja 2	-38.8137	3.88298	3.72955	12.4661		976.351	78.3206
S phryni-hoja 4	-38.3655	4.67955	4.92438	12.3479		1276.92	103.412
S phrynif- hoja 3	-39.7332	4.11162	4.34132	12.4422		1134.33	91.1677
	-38.5937	4.11613	4.14359	13.0081
S wend- hoja 2	-38.5304	2.27843	4.35864	12.9116		1181.81	91.5314
S wend- hoja 1	-39.0579	3.60259	3.72955	15.1905		1189.73	78.3206
S wend- hoja 3	-37.7849	3.97867	3.27079	15.2487		1047.38	68.6866
	-38.4577	3.28656	3.78633	14.4503
