# Supplementary material for: Functional trait diversity of Cyclanthaceae and its convergent evolution with Araceae in Neotropical forests
Source: PeerJ. 2023 Jul 18;11:e15557. doi: 10.7717/peerj.15557 (PMC10361079; doi:10.7717/peerj.15557)
Supplement: Supplemental Information 3 [file peerj-11-15557-s003.xlsx]

## Sheet: CYCLA_COLLS
Supplemental File - collections of Cyclanthaceae in the Herbarium of the La Selva Biological Station.
HERBARIA	Event ID	Species Code	Family	Specie_Name	Col_Acronim	#_Collection	Coll_Date	Site	Station
LSCR	978	LS000377	Cyclanthaceae	Asplundia multistaminata Harling	R. Aguilar	7672	2003-04-09	La Selva, OET; STR 260	Estación Biológica La Selva
LSCR	1612	LS000388	Cyclanthaceae	Evodianthus funifer (Poit.) Lindm.	R. Aguilar	8676	2004-04-15	La Selva, OET; Cantarrana, alrededor de la estación.	Estación Biológica La Selva
LSCR	1008	LS000388	Cyclanthaceae	Evodianthus funifer (Poit.) Lindm.	R. Aguilar	7704	2003-04-23	La Selva, OET; SUR 745	Estación Biológica La Selva
LSCR	1615	LS000390	Cyclanthaceae	Sphaeradenia acutitepala Harling	R. Aguilar	8686	2004-04-15	La Selva, OET; Cantarrana, alrededor de la estación.	Estación Biológica La Selva
LSCR	1631	LS000385	Cyclanthaceae	Cyclanthus bipartitus Poit.	R. Aguilar	8738	2004-05-05	La Selva, OET; Jardines de Laboratorios.	Estación Biológica La Selva
LSCR	1662	LS000389	Cyclanthaceae	Ludovia integrifolia (Woodson) Harling	R. Aguilar	8765	2004-06-07	La Selva, OET; Laboratorios.	Estación Biológica La Selva
LSCR	1781	LS000382	Cyclanthaceae	Carludovica rotundifolia H. Wendl. ex Hook. f.	J. González	7059	2004-10-19	Vesta; R. B. Hitoy Cerere; Camino hacia la poza del rio Hitoy-Cerere. Areas alteradas y ecotonos boscosos.
LSCR	2422	LS000384	Cyclanthaceae	Chorigyne pendula (Hammel) R. Erikss.	O.Vargas	1375	2005-12-06	La Selva, OET; SJ 2020; Der. en Ceiba pentandra.	Estación Biológica La Selva
LSCR	1969	LS000386	Cyclanthaceae	Dicranopygium umbrophilum Hammel	O.Vargas	1602	2006-07-28	La Selva, OET; SIG 400 - 150, Entre STR y CEN.	Estación Biológica La Selva
LSCR	2136	LS000389	Cyclanthaceae	Ludovia integrifolia (Woodson) Harling	O.Vargas	1232	2005-05-15	Isla río Sarapiquí, Chilamate por restaurante Islas del Río.
LSCR	2469	LS000379	Cyclanthaceae	Asplundia uncinata Harling	O.Vargas	1620	2006-09-06	La Selva, OET; CC 103; Izq. 1 m.	Estación Biológica La Selva
LSCR	2487	LS000378	Cyclanthaceae	Asplundia sleeperae Grayum & Hammel	O.Vargas	1635	2006-09-15	La Selva, OET; STR 515; Der. 5 m.	Estación Biológica La Selva
LSCR	2536	LS000378	Cyclanthaceae	Asplundia sleeperae Grayum & Hammel	J. González	8158	2006-08-12	Pocora, Cuenca del Río Destierro, Finca de Erick Berlin.	Reserva Las Brisas
LSCR	2546	LS000385	Cyclanthaceae	Cyclanthus bipartitus Poit.	J. González	8419	2006-11-12	Cordillera Central, Fila Los Arrepentidos, entrando por el Col. Técnico Profesional de Pto. Viejo.
LSCR	2615	LS000380	Cyclanthaceae	Asplundia utilis (Oerst.) Harling	O.Vargas	1706	2007-01-08	La Selva, OET; CES 145; Izq. 1 m., a 8 m. del suelo.	Estación Biológica La Selva
LSCR	2758	LS000380	Cyclanthaceae	Asplundia utilis (Oerst.) Harling	J. González	8943	2007-05-29	La Selva, OET; Sendero Sabalo-Esquinas	Estación Biológica La Selva
LSCR	2875	LS000381	Cyclanthaceae	Asplundia vagans Harling	J. González	9008	2007-06-10	Finca el Bejuco.	Finca El Bejuco
LSCR	2977	LS000374	Cyclanthaceae	Asplundia euryspatha Harling	J. González	8746	2007-05-17	Alto Botella, áreas abiertas y remanentes boscosos.
LSCR	3084	LS000377	Cyclanthaceae	Asplundia multistaminata Harling	N.Zamora	3926	2006-07-26	La Selva, OET; SURA 350	Estación Biológica La Selva
LSCR	3203	LS000378	Cyclanthaceae	Asplundia sleeperae Grayum & Hammel	D. Solano	1263	2004-07-31	La Selva, OET; SOR 0	Estación Biológica La Selva
LSCR	3585	LS000385	Cyclanthaceae	Cyclanthus bipartitus Poit.	J. González	6842	2004-08-21	La Selva, OET; STR; de 0-5000 m.	Estación Biológica La Selva
LSCR	3634	LS000379	Cyclanthaceae	Asplundia uncinata Harling	J. González	7662	2005-07-08	La Selva, OET; SSO; de 0-1450 m. _x000D__x000D_	Estación Biológica La Selva
LSCR	3840	LS000375	Cyclanthaceae	Asplundia ferruginea Grayum & Hammel	J. González	10832	2009-07-21	Reserva Biológica La Tirimbina; Sendero Ajillo. N; W; Elev.	Reserva Biológica Tirimbina
LSCR	3841	LS000378	Cyclanthaceae	Asplundia sleeperae Grayum & Hammel	J. González	10855	2009-08-02	Reserva Biológica La Tirimbina; Sendero Corteza-cacaotal N; W; Elev;	Reserva Biológica Tirimbina
LSCR	3863	LS000375	Cyclanthaceae	Asplundia ferruginea Grayum & Hammel	J. González	10896	2009-08-20	Alto Botella; Áreas abiertas y remanentes boscosos. 577000-227500; Elev. 800-1000 m.
LSCR	3864	LS000376	Cyclanthaceae	Asplundia longitepala Harling	J. González	10870	2009-08-18	Reserva Biológica La Tirimbina; Taludes del brazo oclusado del Río Sarapiquí tras el terremoto de Enero. N; W; Elev;	Reserva Biológica Tirimbina
LSCR	3865	LS000379	Cyclanthaceae	Asplundia uncinata Harling	J. González	10943	2009-08-31	Reserva Biológica La Tirimbina; Senderos Ceiba-Canopy. N; W; Elev;	Reserva Biológica Tirimbina
LSCR	3866	LS000381	Cyclanthaceae	Asplundia vagans Harling	J. González	10901	2009-08-20	Alto Botella; Áreas abiertas y remanentes boscosos. 577000-227500; Elev. 800-1000 m.
LSCR	4275	LS000377	Cyclanthaceae	Asplundia multistaminata Harling	J. González	7942	2006-07-13	Alto Botella; Áreas abiertas y remanentes boscosos. 577000-227500; Elev. 800-1000 m.
LSCR	4280	LS000381	Cyclanthaceae	Asplundia vagans Harling	J. González	7958	2006-07-13	Alto Botella; Áreas abiertas y remanentes boscosos. 577000-227500; Elev. 800-1000 m.
LSCR	4307	LS000388	Cyclanthaceae	Evodianthus funifer (Poit.) Lindm.	J. González	8015	2006-08-10	Cuenca de la Quebrada "45" ("el rubio", en hoja cartografica), faldas del Alto Botella; Áreas abiertas y remanentes boscosos. 580150-227900; Elev. 500-700 m.
LSCR	5165	LS000389	Cyclanthaceae	Ludovia integrifolia (Woodson) Harling	J. González	8344	2004-10-19	Alto Botella; Areas abiertas y remanentes boscosos. 577000-227500; Elev. 800-1000 m.
LSCR	5465	LS000388	Cyclanthaceae	Evodianthus funifer (Poit.) Lindm.	J. González	8745	2007-05-17	Alto Botella; Areas abiertas y remanentes boscosos. 577000-227500; Elev. 800-1000 m.
LSCR	5038	LS000376	Cyclanthaceae	Asplundia longitepala Harling	J. González	8032	2006-08-10	Cuenca de la Quebrada "45" ("el rubio", en hoja cartografica), faldas del Alto Botella; Areas abiertas y remanentes boscosos. 580150-227900; Elev. 500-700 m.
LSCR	5071	LS000388	Cyclanthaceae	Evodianthus funifer (Poit.) Lindm.	J. González	8125	2007-08-11	Alto Botella; Areas abiertas y remanentes boscosos. 577000-227500; Elev. 800-1000 m.
LSCR	5087	LS000387	Cyclanthaceae	Dicranopygium wedelii Harling	J. González	8145	2006-08-12	Pocora, Cuenca del Río Destierro, Finca de Erick Berlin. 579900-235800; Elev. 300 m.
LSCR	5096	LS000379	Cyclanthaceae	Asplundia uncinata Harling	J. González	8184	2006-08-12	Pocora, Cuenca del Río Destierro, Finca de Erick Berlin. 579900-235800; Elev. 300 m.
LSCR	5197	LS000383	Cyclanthaceae	Carludovica sulcata Hammel	J. González	8399	2006-11-10	Cordillera Central, Fila Los Arrepentidos, entrando por el CTP de Pto. Viejo. 532000-274500; Elev. 100 m.
LSCR	5291	LS000388	Cyclanthaceae	Evodianthus funifer (Poit.) Lindm.	J. González	8512	2007-02-17	La Selva, OET; Sendero Peje, de 0-1200 m.	Estación Biológica La Selva
LSCR	5424	LS000387	Cyclanthaceae	Dicranopygium wedelii Harling	J. González	8698	2007-04-23	Chilamate; Finca de Miguel Oconitrillo; áreas abiertas y remanentes boscosos en las márgJans del Río Bijagual; 529900-274500; Elev. 150 m.
LSCR	5431	LS000374	Cyclanthaceae	Asplundia euryspatha Harling	J. González	8705	2007-05-16	Finca de Erick Berlin. Cuenca del Rio Destierro. Areas alteradas y remanentes boscosos. 579900-235800; Elev. 250 m.
LSCR	5432	LS000388	Cyclanthaceae	Evodianthus funifer (Poit.) Lindm.	J. González	8706	2007-05-16	Finca de Erick Berlin. Cuenca del Rio Destierro. Areas alteradas y remanentes boscosos. 579900-235800; Elev. 250 m.
LSCR	5527	LS000388	Cyclanthaceae	Evodianthus funifer (Poit.) Lindm.	J. González	8857	2007-05-17	Alto Botella; Areas abiertas y remanentes boscosos. 577000-227500; Elev. 800-1000 m.
LSCR	5553	LS000386	Cyclanthaceae	Dicranopygium umbrophilum Hammel	J. González	8887	2007-05-26	La Selva, OET; Circuito: Sendero Sarapiquí-Lindero Sur-Lindero Occidental.	Estación Biológica La Selva
LSCR	5588	LS000386	Cyclanthaceae	Dicranopygium umbrophilum Hammel	J. González	8924	2007-05-27	Cordillera Central, Fila Los Arrepentidos, entrando por el Centro Turistico los Guajipales 273100-534500; Elev. 50 m.
LSCR	5598	LS000386	Cyclanthaceae	Dicranopygium umbrophilum Hammel	J. González	8936	2007-05-29	La Selva, OET; SSE .	Estación Biológica La Selva
LSCR	5629	LS000385	Cyclanthaceae	Cyclanthus bipartitus Poit.	J. González	9000	2007-06-10	Cerros Sardinal; Finca el Bejuco. 529200-271300; Elev. 100 m.	Finca El Bejuco
LSCR	5633	LS000380	Cyclanthaceae	Asplundia utilis (Oerst.) Harling	J. González	9009	2007-06-10	Cerros Sardinal; Finca el Bejuco. 529200-271300; Elev. 100 m.	Finca El Bejuco
LSCR	5687	LS000379	Cyclanthaceae	Asplundia uncinata Harling	J. González	9112	2007-07-03	La Tirimbina. 523500-265500; Elev; 100-200 m.	Reserva Biológica Tirimbina
LSCR	5703	LS000385	Cyclanthaceae	Cyclanthus bipartitus Poit.	J. González	9129	2007-07-03	La Tirimbina. 523500-265500; Elev; 100-200 m.	Reserva Biológica Tirimbina
LSCR	5739	LS000389	Cyclanthaceae	Ludovia integrifolia (Woodson) Harling	J. González	9178	2007-07-07	Cordillera Central, Fila Los Arrepentidos, entrando por el CTP de Pto. Viejo. 532000-274500; Elev. 100 m.
LSCR	5754	LS000382	Cyclanthaceae	Carludovica rotundifolia H. Wendl. ex Hook. f.	J. González	9195	2007-07-19	La Selva, OET; Avenida Marañon, camino hacía la Casa de la Guaria.	Estación Biológica La Selva
LSCR	5896	LS000381	Cyclanthaceae	Asplundia vagans Harling	J. González	9378	2007-09-04	Alto Botella; Areas abiertas y remanentes boscosos. 577000-227500; Elev. 800-1000 m.
LSCR	6045	LS000374	Cyclanthaceae	Asplundia euryspatha Harling	J. González	9580	2007-12-26	Alto Botella; Areas abiertas y remanentes boscosos. 577000-227500; Elev. 800-1000 m.
LSCR	6069	LS000381	Cyclanthaceae	Asplundia vagans Harling	J. González	9631	2007-12-26	Alto Botella; Areas abiertas y remanentes boscosos. 577000-227500; Elev. 800-1000 m.
LSCR	6564	LS000379	Cyclanthaceae	Asplundia uncinata Harling	J. González	10195	2008-08-08	La Tirimbina. La Isla.	Reserva Biológica Tirimbina
LSCR	6574	LS000390	Cyclanthaceae	Sphaeradenia acutitepala Harling	J. González	10205	2008-08-08	La Tirimbina. La Isla.	Reserva Biológica Tirimbina
LSCR	6151	LS000385	Cyclanthaceae	Cyclanthus bipartitus Poit.	J. González	9762	2008-06-01	La Tirimbina; Sendero al Cacaotal.	Reserva Biológica Tirimbina
LSCR	6412	LS000385	Cyclanthaceae	Cyclanthus bipartitus Poit.	J. González	10039	2008-07-17	La Tirimbina; Sendero Botarrama.	Reserva Biológica Tirimbina
LSCR	6433	LS000379	Cyclanthaceae	Asplundia uncinata Harling	J. González	10061	2008-07-17	La Tirimbina; Sendero Botarrama.	Reserva Biológica Tirimbina
LSCR	6436	LS000381	Cyclanthaceae	Asplundia vagans Harling	J. González	10065	2008-07-17	La Tirimbina; Sendero Botarrama.	Reserva Biológica Tirimbina
LSCR	6437	LS000380	Cyclanthaceae	Asplundia utilis (Oerst.) Harling	J. González	10066	2008-07-17	La Tirimbina; Sendero Botarrama.	Reserva Biológica Tirimbina
LSCR	6443	LS000386	Cyclanthaceae	Dicranopygium umbrophilum Hammel	J. González	10072	2007-07-19	La Tirimbina; Sendero Corteza.	Reserva Biológica Tirimbina
LSCR	6455	LS000374	Cyclanthaceae	Asplundia euryspatha Harling	J. González	10084	2007-07-19	La Tirimbina; Sendero Corteza.	Reserva Biológica Tirimbina
LSCR	6526	LS000387	Cyclanthaceae	Dicranopygium wedelii Harling	J. González	10156	2008-07-24	La Tirimbina; Sendero Hunter.	Reserva Biológica Tirimbina
LSCR	6638	LS000383	Cyclanthaceae	Carludovica sulcata Hammel	J. González	10276	2008-08-14	La Tirimbina. La Isla, aguas abajo.	Reserva Biológica Tirimbina
LSCR	6786	LS000387	Cyclanthaceae	Dicranopygium wedelii Harling	J. González	10442	2008-10-22	La Tirimbina; Senderos Botarrama y Theobroma.	Reserva Biológica Tirimbina
LSCR	6804	LS000374	Cyclanthaceae	Asplundia euryspatha Harling	J. González	10464	2008-11-13	La Tirimbina; Sendero Corteza.	Reserva Biológica Tirimbina
LSCR	6871	LS000378	Cyclanthaceae	Asplundia sleeperae Grayum & Hammel	J. González	10538	2006-12-22	La Tirimbina; Sendero Corteza-Cacaotal.	Reserva Biológica Tirimbina
LSCR	6957	LS000377	Cyclanthaceae	Asplundia multistaminata Harling	J. González	10639	2009-03-11	La Tirimbina; Sendero Botarrama.	Reserva Biológica Tirimbina
LSCR	7000	LS000381	Cyclanthaceae	Asplundia vagans Harling	J. González	10694	2007-05-16	La Tirimbina; Sendero Hunter.	Reserva Biológica Tirimbina
LSCR	7088	LS000387	Cyclanthaceae	Dicranopygium wedelii Harling	J. González	10811	2009-06-21	La Tirimbina; Islote, bordeando el Río Sarapiquí, hasta el Cacaotal.	Reserva Biológica Tirimbina
LSCR	7251	LS000380	Cyclanthaceae	Asplundia utilis (Oerst.) Harling	J. González	11077	2010-04-30	La Selva, OET; SHO-SUA-CCL.	Estación Biológica La Selva
LSCR	7278	LS000375	Cyclanthaceae	Asplundia ferruginea Grayum & Hammel	J. González	11106	2010-05-07	La Selva, OET; SSE-SHO.	Estación Biológica La Selva
LSCR	7535	LS000386	Cyclanthaceae	Dicranopygium umbrophilum Hammel	J. González	6910	2004-09-10	La Selva, OET; Sendero oriental, hasta la interseccion con el sendero Holdridge y Sabalo-esquina.	Estación Biológica La Selva
LSCR	7578	LS000390	Cyclanthaceae	Sphaeradenia acutitepala Harling	J. González	10841	2009-07-21	Reserva Biológica La Tirimbina; Sendero Ajillo.	Reserva Biológica Tirimbina
LSCR	7628	LS000377	Cyclanthaceae	Asplundia multistaminata Harling	J. González	10613	2009-02-10	La Tirimbina; Sendero Botarrama.	Reserva Biológica Tirimbina
LSCR	7976	LS000377	Cyclanthaceae	Asplundia multistaminata Harling	B. Hammel	8995	1980-06-08	La Selva, OTS; Along el Sura behind air conditioned lab.	Estación Biológica La Selva
LSCR	7977	LS000380	Cyclanthaceae	Asplundia utilis (Oerst.) Harling	B. Hammel	11569	1982-04-03	La Selva, OTS; Along Quebrada Sabalo near successional strips.	Estación Biológica La Selva
LSCR	7978	LS000381	Cyclanthaceae	Asplundia vagans Harling	B. Hammel	8630	1980-05-10	La Selva, OTS; In tree on Near Loop.	Estación Biológica La Selva
LSCR	7979	LS000386	Cyclanthaceae	Dicranopygium umbrophilum Hammel	B. Hammel	8645	1980-05-13	La Selva, OTS; Along swampy reaches of Q. El Pantano between Old East Boundary and Hartshorn Trail.	Estación Biológica La Selva
LSCR	7980	LS000387	Cyclanthaceae	Dicranopygium wedelii Harling	B. Hammel	11453	1982-03-25	La Selva, OTS; In Quebrada el Salto just below crossing on Far Loop Trail.	Estación Biológica La Selva
LSCR	7981	LS000388	Cyclanthaceae	Evodianthus funifer (Poit.) Lindm.	B. Hammel	8605	1980-05-06	La Selva, OTS; In trees at back side of swamp off Research Trail.	Estación Biológica La Selva
LSCR	7982	LS000389	Cyclanthaceae	Ludovia integrifolia (Woodson) Harling	B. Hammel	8205	1980-03-22	La Selva, OTS; East River Road.	Estación Biológica La Selva
LSCR	9272	LS000389	Cyclanthaceae	Ludovia integrifolia (Woodson) Harling	R. Aguilar	8602	2004-04-15	Cantarrana, alrededor de la estación.
LSCR	9339	LS000389	Cyclanthaceae	Ludovia integrifolia (Woodson) Harling	R. Aguilar	8679	2004-04-15	Cantarrana, alrededor de la estación.
LSCR	9991	LS000388	Cyclanthaceae	Evodianthus funifer (Poit.) Lindm.	J. González	11565	2013-05-18	Refugio Privado de Vida Silvestre Nogal; 10° 27' 23'' N; 83° 56' 44" W; 50 m.	Refugio de Vida Silvestre Nogal
LSCR	10083	LS000377	Cyclanthaceae	Asplundia multistaminata Harling	J. González	11657	2013-08-23	Puerto Viejo; Puerto Viejo, camino a las Marias; El Gavilán; bosque remanente propiedad de COBAL; 10° 29' 14'' N; 83° 59' 08" W; 53 m.
LSCR	10100	LS000383	Cyclanthaceae	Carludovica sulcata Hammel	J. González	11674	2013-09-06	Puerto Viejo; Puerto Viejo, camino a las Marias; El Gavilán; bosque remanente propiedad de COBAL; 10° 29' 14'' N; 83° 59' 08" W; 53 m.
LSCR	10345	LS000388	Cyclanthaceae	Evodianthus funifer (Poit.) Lindm.	J. González	7034	2004-10-16	Vesta; Cerro Bitarkara (llamado "Cartago" por los indígenas), sendero al rio Hitoy; Áreas y bosques alterados. 09° 38' 20'' N, 83° 08' 14'' W, 1025 m.
LSCR	10348	LS000381	Cyclanthaceae	Asplundia vagans Harling	J. González	7038	2004-10-16	Vesta; Cerro Bitarkara (llamado "Cartago" por los indígenas), sendero al rio Hitoy; Áreas y bosques alterados. 09° 38' 20'' N, 83° 08' 14'' W, 1025 m.
LSCR	10375	LS000378	Cyclanthaceae	Asplundia sleeperae Grayum & Hammel	J. González	7490	2005-04-15	Colonia Virgen del Socorro, Finca Murillo, áreas alteradas y bosques remanentes. 10° 14' 00" N, 84° 06' 00" W, 1500 m.
LSCR	10378	LS000381	Cyclanthaceae	Asplundia vagans Harling	J. González	7625	2005-06-08	Colonia Carvajal; áreas boscosas remanentes. 519500-255750; 500 m.
LSCR	10403	LS000381	Cyclanthaceae	Asplundia vagans Harling	J. González	8066	2006-08-11	Alto Botella; Áreas abiertas y remanentes boscosos. 577000-227500; Elev. 800-1000 m.
LSCR	10408	LS000380	Cyclanthaceae	Asplundia utilis (Oerst.) Harling	J. González	8093	2006-08-11	Alto Botella; Áreas abiertas y remanentes boscosos. 577000-227500; Elev. 800-1000 m.
LSCR	10414	LS000374	Cyclanthaceae	Asplundia euryspatha Harling	J. González	8107	2006-08-11	Alto Botella; Áreas abiertas y remanentes boscosos. 577000-227500; Elev. 800-1000 m.
LSCR	10451	LS000381	Cyclanthaceae	Asplundia vagans Harling	J. González	8363	2006-10-19	Alto Botella; Áreas abiertas y remanentes boscosos. 577000-227500; Elev. 800-1000 m.
LSCR	10452	LS000374	Cyclanthaceae	Asplundia euryspatha Harling	J. González	8364	2006-10-19	Alto Botella; Áreas abiertas y remanentes boscosos. 577000-227500; Elev. 800-1000 m.
LSCR	10453	LS000381	Cyclanthaceae	Asplundia vagans Harling	J. González	8365	2006-10-19	Alto Botella; Áreas abiertas y remanentes boscosos. 577000-227500; Elev. 800-1000 m.
LSCR	10454	LS000374	Cyclanthaceae	Asplundia euryspatha Harling	J. González	8366	2006-10-19	Alto Botella; Áreas abiertas y remanentes boscosos. 577000-227500; Elev. 800-1000 m.
LSCR	10457	LS000381	Cyclanthaceae	Asplundia vagans Harling	J. González	8369	2006-10-19	Alto Botella; Áreas abiertas y remanentes boscosos. 577000-227500; Elev. 800-1000 m.
LSCR	10458	LS000381	Cyclanthaceae	Asplundia vagans Harling	J. González	8370	2006-10-19	Alto Botella; Áreas abiertas y remanentes boscosos. 577000-227500; Elev. 800-1000 m.
LSCR	10459	LS000374	Cyclanthaceae	Asplundia euryspatha Harling	J. González	8371	2006-10-19	Alto Botella; Áreas abiertas y remanentes boscosos. 577000-227500; Elev. 800-1000 m.
LSCR	10463	LS000386	Cyclanthaceae	Dicranopygium umbrophilum Hammel	J. González	8417	2006-11-12	Cordillera Central, Fila Los Arrepentidos, entrando por el CTP de Pto. Viejo. 532000-274500; Elev. 100 m.
